# Supplementary material for: The media trial of Jacob Zuma: ethical journalism in the new South Africa
Source: Royal Society of Chemistry journal article supplement (doi:10.1039/c6an00694a), 2011-09-06
Supplement: c6an00694a1.pdf [file c6an00694a1.pdf]

# **Label-free, ITO-based immunosensor for the detection of a cancer biomarker; Receptor for Activated C Kinase 1**

**Elif Burcu Bahadır<sup>a</sup>, Mustafa Kemal Sezgintürk<sup>b\*</sup>**

**<sup>a</sup>Namık Kemal University, Scientific and Technological Research Center, Tekirdağ-  
TÜRKİYE**

**<sup>b</sup>Namık Kemal University, Faculty of Science, Chemistry Department,  
Biochemistry Division, Tekirdağ-TÜRKİYE**

**\*Corresponding Author:**

**e-mail:** [msezginturk@hotmail.com](mailto:msezginturk@hotmail.com)

[msezginturk@nku.edu.tr](mailto:msezginturk@nku.edu.tr)

**Tel:**+90 282 250 26 05

## Supplemental Informaiton

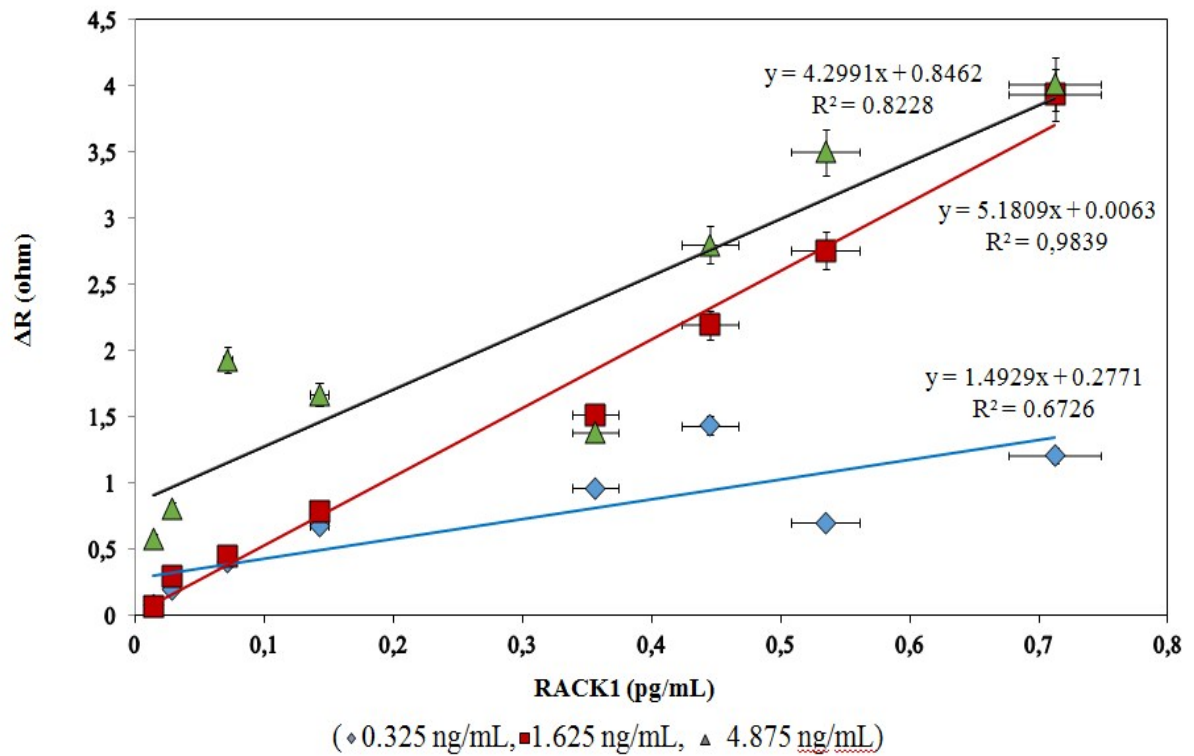

**Figure 1.** The effect of anti-RACK1 antibody concentrations on the biosensor response

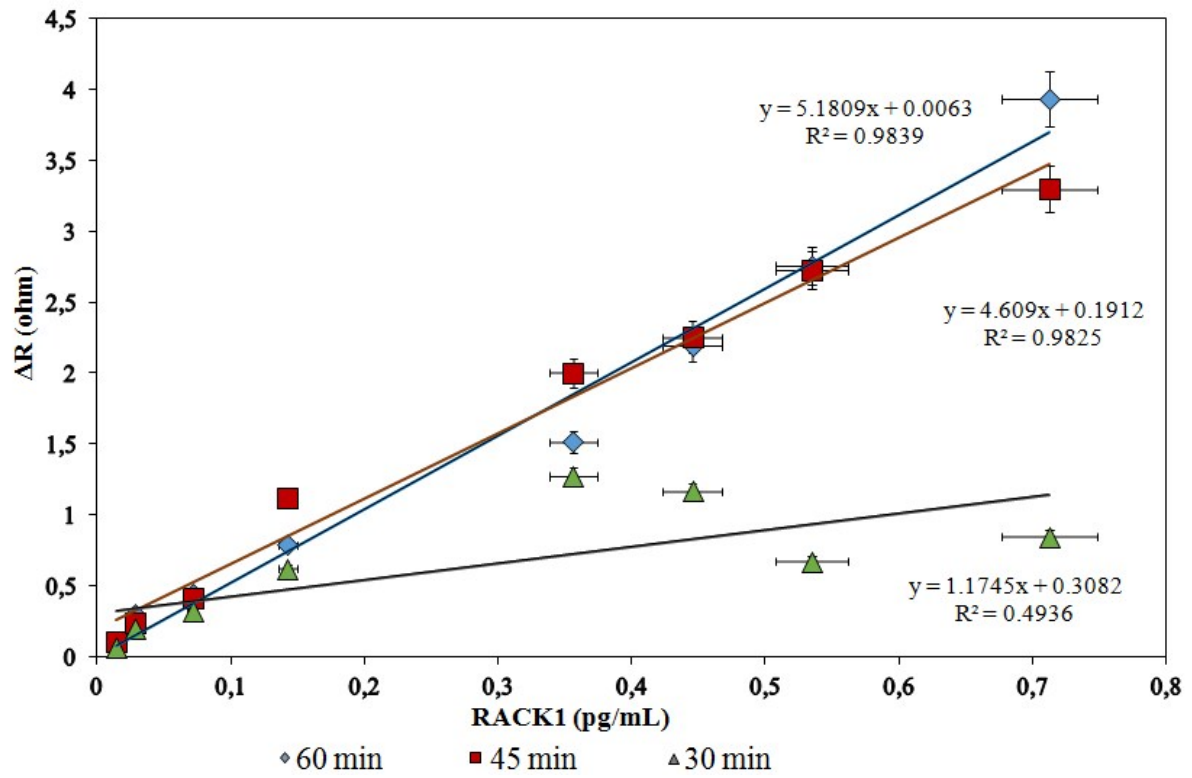

**Figure 2.** RACK1 calibration curves obtained for different anti-RACK1 incubation periods

## Artificial serum sample analyses results

6 different artificial serum samples were analysed by the immunosensor and corresponding results are given in Supp.info. Table 1. The recovery of the immunosensor was found to be between 96.09 % and 101.83%. The results illustrated that; the new ITO based immunosensor can be used successfully in RACK1 quantification in the samples.

| <b>Added (fg/mL)</b> | <b>Found by biosensor (fg/mL)</b> | <b>% Recovery</b> | <b>% Relative difference</b> |
|----------------------|-----------------------------------|-------------------|------------------------------|
| 28.5                 | 28.67                             | 100.58            | +0.59                        |
| 14.25                | 145.12                            | 101.83            | +1.83                        |
| 356.25               | 356.94                            | 100.19            | +0.19                        |
| 445.31               | 444.55                            | 99.83             | -0.17                        |
| 534.75               | 513.86                            | 96.09             | -3.91                        |
| 712.5                | 722.91                            | 101.46            | +1.46                        |
